# Supplementary material for: Fe3O4@mSiO2 core–shell nanocomposite capped with disulfide gatekeepers for enzyme-sensitive controlled release of anti-cancer drugs
Source: Royal Society of Chemistry journal article supplement (doi:10.1039/c4tb01788a), 2014-11-21
Supplement: c4tb01788a1.pdf [file c4tb01788a1.pdf]

**Fe<sub>3</sub>O<sub>4</sub>@mSiO<sub>2</sub> Core-Shell Nanocomposite Capped with Disulfide  
Gatekeepers for Enzyme-Sensitive Controlled Release of Anti-Cancer  
Drug**

Chunyu Yang<sup>†</sup>, Wei Guo<sup>†</sup>, Liru Cui<sup>§</sup>, Na An<sup>§</sup>, Ting Zhang<sup>§</sup>,

Gang Guo<sup>§\*</sup>, Huiming Lin<sup>†\*</sup> and Fengyu Qu<sup>†\*</sup>

<sup>†</sup> Department of Photoelectric Band Gap Materials Key Laboratory of Ministry of Education, Harbin Normal University, Harbin 150025, China

<sup>§</sup> College of Chemistry and Chemical Engineering, Harbin Normal University, Harbin 150025, China

**\*To whom all correspondence should be addressed.** Tel: (+86) 451-88060653. E-mail:  
qufengyu@hrbnu.edu.cn, linhuiming@hrbnu.edu.cn, and guogang19761126@sina.com

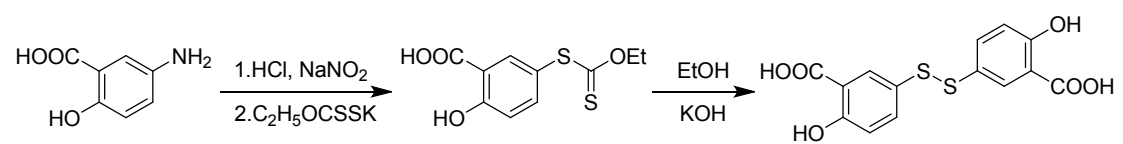

**Fig. S1** Synthetic route for the disulfide

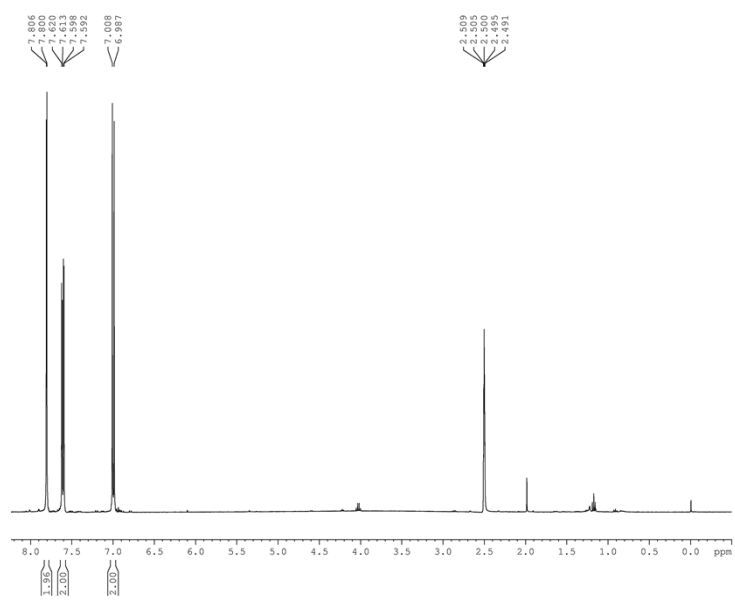

$^1\text{H-NMR}$  (DMSO, 400MHz): 7.80 (d,  $J=2.4\text{Hz}$ , 2H), 7.60 (dd,  $J_1=8.6\text{Hz}$ ,  $J_2=2.4\text{Hz}$ , 2H), 7.00(d,  $J=8.6\text{Hz}$ , 2H).

**Fig. S2** The NMR spectrum of as-synthesized R-S-S-R in DMSO.
